# Supplementary material
Source: PubMed Central journal article supplement (PMC1856478)
Supplement: gut_2005.088518_1.pdf [file gut_2005.088518_1.pdf]

## **Supplementary Materials Legend**

*Supplementary Video 1: Endoscopic submucosal dissection and transplantation of autologous oral mucosal epithelial cell sheets.*

The ulcer region is first marked using the flex knife. The mucosal layers are then separated from the underlying submucosa by injection of glycerol solution containing indigo carmine dye and the peripheral areas are cut using both the flex and hook knives. Dissection is then performed using the hook knife and the sample is retrieved using endoscopic forceps, revealing an oesophageal ulcer site. The harvested oral mucosal epithelial cell sheet is then passed through the EMR tube to the ulcer site and carefully placed on the ulcer bed using endoscopic forceps. The EMR tube is then used to apply gentle pressure to help attach the cell sheet to the underlying muscle layers. After resting undisturbed on the ulcer site for ten minutes, the PVDF support membrane is carefully removed with endoscopic forceps, leaving the cell sheet attached to the ulcer site.
